# Supplementary material for: A novel statistical method to estimate the effective SNP size in vertebrate genomes and categorized genomic regions
Source: Springer Nature journal article supplement (doi:10.1186/1471-2164-7-329), 2006-12-01
Supplement: Additional file 1 [file 1471-2164-7-329-s1.doc]

## Table S1 - Bias comparison using genome-wide dog SNPs

aPosition relative to the polymorphic site. A minus sign indicates the 5’ side and a positive sign indicates the 3’ side.
